# Supplementary material for: The Effect of Dietary Supplements on Oxidative Stress in Pregnant Women with Gestational Diabetes Mellitus: A Network Meta-Analysis
Source: MDPI journal article supplement (doi:10.3390/nu13072284), 2021-06-30
Supplement: s1 [file s1]

Table S1. Excluded studies.

| #  | Author                        | PMID or DOI                | Reason for exclusion                                                                         |
|----|-------------------------------|----------------------------|----------------------------------------------------------------------------------------------|
| 1. | Asemi 2013 [92]               | 23466048                   | Diet modification (DASH diet) rather than specific dietary supplementation.                  |
| 2  | Jamilian 2018 [73]            | 29385062                   | No markers of oxidative stress were assessed                                                 |
| 3  | Lopez-Tinoco 2011 [93]        | 21327985                   | Not a randomized clinical trial                                                              |
| 4  | Samimi 2015 [94]              | 24973862                   | No markers of oxidative stress were assessed                                                 |
| 5  | Smith 2015 [95]               | 10.1016/j.ajog.2014.10.864 | Pharmaceutical intervention (metformin) rather than dietary supplementation.                 |
| 6  | Yazdchi 2016 [96]             | 27247730                   | No markers of oxidative stress were assessed                                                 |
| 7  | Yessoufou 2015 [97]           | 25961055                   | Not a randomized clinical trial                                                              |
| 8  | Aslfalah 2018 [98]            | 30328246                   | Same population examined in Aslfalah 2018-adiponectin                                        |
| 9  | Dolatkhah 2015 [99]           | 26825666                   | No markers of oxidative stress were assessed                                                 |
| 10 | Li, Q., & Xing, B. 2016 [100] | 27336154                   | No markers of oxidative stress were assessed                                                 |
| 11 | Valizadeh, M. 2016 [101]      | 27679649                   | Outcomes were measured 6-12 weeks post-partum rather than during pregnancy.                  |
| 12 | Liang HY [102]                | 19620065                   | Article is written in non-European language (Chinese)                                        |
| 13 | Jafarnejad 2016 [103]         | 27429803                   | No markers of oxidative stress were assessed                                                 |
| 14 | Zhang 2016 [19]               | 27588106                   | SD of the outcomes was not provided specifically and could only be speculated by the graphs. |

Table S2. SUCRA values of different antibiotic treatments for the primary and secondary outcomes.

| Rank | SUCRA $\Delta$ TAC         | SUCRA $\Delta$ MDA         | SUCRA TAC                  | SUCRA MDA                  | SUCRA $\Delta$ GSH         | SUCRA GSH                  |
|------|----------------------------|----------------------------|----------------------------|----------------------------|----------------------------|----------------------------|
| 1    | $\Omega$ -3 + VIT E (95.5) | $\Omega$ -3 (66.5)         | $\Omega$ -3 + VIT E (96.4) | VIT C (100)                | SOY (85)                   | VIT C (97.8)               |
| 2    | SOY (72.3)                 | ZINC (65.1)                | $\Omega$ -3 + VIT D (85.2) | VIT D (83.7)               | SEL (84.4)                 | $\Omega$ -3 + VIT D (82.9) |
| 3    | PROB (67.2)                | $\Omega$ -3 + VIT D (64.7) | PROB + VITD (84.6)         | $\Omega$ -3 + VIT D (83.7) | VIT D + CAL (83.4)         | PROB (62.8)                |
| 4    | ZINC (62.1)                | VIT D + CAL (64.3)         | PROB (69.3)                | $\Omega$ -3 + VIT E (68.8) | $\Omega$ -3 + VIT D (80.6) | $\Omega$ -3 (56.5)         |
| 5    | $\Omega$ -3 + VIT D (53.7) | MAG (60.1)                 | VIT D (53.1)               | PROB (58.3)                | PROB (54.2)                | MAG-ZIN-CAL (55.5)         |
| 6    | MAG (49.6)                 | VIT D (54.3)               | SEL (51.6)                 | MAG-ZIN-CAL (52.3)         | $\Omega$ -3 (46.1)         | VIT D + PROB (55.3)        |
| 7    | MAG-ZIN-CAL (47.3)         | $\Omega$ -3 + VIT E (52.1) | $\Omega$ -3 (49.1)         | SOY (45.3)                 | $\Omega$ -3 + VIT E (44.5) | ZINC (51.3)                |
| 8    | SEL (43.1)                 | MAG-ZIN-CAL (42.6)         | MAG (47.6)                 | $\Omega$ -3 (44.1)         | VIT D (43.7)               | PLA (47.3)                 |
| 9    | $\Omega$ -3 (38.3)         | PROB (42.4)                | ZINC (36.7)                | VIT D + CAL (43.4)         | MAG-ZIN-CAL (38.1)         | SEL (45.1)                 |
| 10   | VIT D (34.8)               | SOY (35.1)                 | SOY (33.2)                 | PROB + VIT D (28.9)        | PLA (19.5)                 | MAG (33.1)                 |
| 11   | VIT D + CAL (18.3)         | PLA (2.6)                  | PLA (27.7)                 | MAG (22.2)                 | ZINC (18.6)                | $\Omega$ -3 + VIT E (32.9) |
| 12   | PLA (17.3)                 |                            | MAG-ZIN-CAL (26.4)         | ZINC (10.4)                | MAG (2.1)                  | VIT D + CAL (31.7)         |
| 13   |                            |                            | VIT D + CAL (22.7)         | PLA (9.0)                  |                            | VIT D (25.9)               |
| 14   |                            |                            |                            |                            |                            | SOY (19.8)                 |

Table S3. GRADE of the  $\Delta$ TAC outcome (changes in Total Antioxidant Capacity) outcome

| Outcomes                                | N <sup>o</sup> of participants (studies) | Mean Difference (95% CI)       | Certainty of the evidence (GRADE) | Comments |
|-----------------------------------------|------------------------------------------|--------------------------------|-----------------------------------|----------|
| MAG-ZIN-CALvs Placebo (direct evidence) | 60 (1 study)                             | <b>54.50 (1.27, 97.73)</b>     | High                              |          |
| MAG-ZIN-CALvs Placebo (Network MA)      |                                          | <b>54.50 (-48.52,157.52)</b>   | Moderate                          | c        |
| MAG vs Placebo (direct evidence)        | 70 (1 study)                             | <b>61.90 (-91.90, 215.70)</b>  | Low                               | 1,4      |
| MAG vs Placebo (Network MA)             |                                          | <b>61.90 (-118.10,241.90)</b>  | Low                               | a, c     |
| PROB vs Placebo (direct evidence)       | 120 (2 studies)                          | <b>96.34 (51.10, 141.58)</b>   | High                              |          |
| PROB vs Placebo (Network MA)            |                                          | <b>96.24 (16.12,176.36)</b>    | High                              |          |
| SEL vs Placebo (direct evidence)        | 70 (1 study)                             | <b>45.53 (-9.70, 100.76)</b>   | Moderate                          | 4        |
| SEL vs Placebo (Network MA)             |                                          | <b>45.53 (-63.07,154.13)</b>   | Moderate                          | c        |
| SOY vs Placebo (direct evidence)        | 68 (1 study)                             | <b>116.80 (38.55, 195.05)</b>  | High                              |          |
| SOY vs Placebo (Network MA)             |                                          | <b>116.80 (-5.13,238.73)</b>   | Moderate                          | c        |
| VIT D vs Placebo (direct evidence)      | 60 (1 study)                             | <b>14.85 (-81.08, 110.79)</b>  | Moderate                          | 4        |
| VIT D vs Placebo (Network MA)           |                                          | <b>29.15 (-73.29,131.60)</b>   | Moderate                          | c        |
| VIT D-CAL vs Placebo (direct evidence)  | 56 (1 study)                             | <b>-15.42 (-85.95, 55.11)</b>  | Moderate                          | 4        |
| VIT D-CAL vs Placebo (Network MA)       |                                          | <b>-15.42 (-132.54,101.70)</b> | Moderate                          | c        |
| ZINC vs Placebo (direct evidence)       | 50 (1 study)                             | <b>88.40 (28.61, 148.19)</b>   | High                              |          |
| ZINC vs Placebo (Network MA)            |                                          | <b>88.40 (-22.59,199.39)</b>   | Very low                          | c        |
| Ω3 vs Placebo (direct evidence)         | 114 (2 studies)                          | <b>35.68 (-68.64, 140.01)</b>  | Moderate                          | 4        |
| Ω3 vs Placebo (Network MA)              |                                          | <b>37.03 (-39.18,113.24)</b>   | High                              |          |
| Ω3-VIT D vs Placebo (direct evidence)   | 60 (1 study)                             | <b>91.10 (50.05, 132.15)</b>   | High                              |          |
| Ω3-VIT D vs Placebo (Network MA)        |                                          | <b>66.15 (-29.60,161.91)</b>   | Moderate                          | c        |
| Ω3-VIT E vs Placebo (direct evidence)   | 60 (1 study)                             | <b>220.00 (125.93, 314.07)</b> | High                              |          |
| Ω3-VIT E vs Placebo (Network MA)        |                                          | <b>220.00 (87.36,352.64)</b>   | High                              |          |
| Ω3 vs VIT D (direct evidence)           | 60 (1 study)                             | <b>33.30 (-22.57,89.12)</b>    | Moderate                          | 4        |
| Ω3 vs VIT D (Network MA)                |                                          | <b>7.87 (-94.82,110.56)</b>    | Moderate                          | c        |
| Ω3-VIT D vs VIT D (direct evidence)     | 60 (1 study)                             | <b>37.0 (-13.84,87.84)</b>     | Moderate                          | 4        |
| Ω3-VIT D vs VIT D (Network MA)          |                                          | <b>37.00 (-69.44,143.44)</b>   | Moderate                          | c        |
| Ω3-VIT D vs Ω3 (direct evidence)        | 60 (1 study)                             | <b>3.70 (-38.60,46.0)</b>      | Moderate                          | 4        |
| Ω3-VIT D vs Ω3 (Network MA)             |                                          | <b>29.13 (-66.88,125.14)</b>   | Moderate                          | c        |
| MAG-ZIN-CALvs MAG (Network MA)          |                                          | <b>7.40 (-199.99, 214.79)</b>  | Moderate                          | c        |

| Outcomes                                  | Nº of participants<br>(studies) | Mean Difference<br>(95% CI)      | Certainty of the evidence<br>(GRADE) | Comments |
|-------------------------------------------|---------------------------------|----------------------------------|--------------------------------------|----------|
| MAG-ZIN-CALvs PROB<br>(Network MA)        |                                 | <b>41.74 (-88.76, 172.25)</b>    | Moderate                             | c        |
| MAG-ZIN-CALvs SEL<br>(Network MA)         |                                 | <b>-7.40 (-199.99, 214.79)</b>   | Moderate                             | c        |
| MAG-ZIN-CALvs SOY<br>(Network MA)         |                                 | <b>62.30 (-97.32, 221.92)</b>    | Moderate                             | c        |
| MAG-ZIN-CALvs VIT D<br>(Network MA)       |                                 | <b>-25.35 (-170.63, 119.94)</b>  | Moderate                             | c        |
| MAG-ZIN-CALvs VIT D -<br>CAL (Network MA) |                                 | <b>--25.35 (-170.63, 119.94)</b> | Moderate                             | c        |
| MAG-ZIN-CALvs ZINC<br>(Network MA)        |                                 | <b>33.90 (-117.53, 185.33)</b>   | Moderate                             | c        |
| MAG-ZIN-CALvs Ω3<br>(Network MA)          |                                 | <b>-17.47 (-145.62, 110.67)</b>  | Moderate                             | c        |
| MAG-ZIN-CALvs Ω3 –<br>VIT D (Network MA)  |                                 | <b>11.65 (-128.99, 152.30)</b>   | Moderate                             | c        |
| MAG-ZIN-CALvs Ω3 –<br>VIT E (Network MA)  |                                 | <b>165.50 (-2.44, 333.44)</b>    | Moderate                             | c        |
| MAG vs PROB (Network<br>MA)               |                                 | <b>34.34 (-162.68, 231.37)</b>   | Moderate                             | c        |
| MAG vs SEL (Network<br>MA)                |                                 | <b>-16.37 (-226.59, 193.85)</b>  | Moderate                             | c        |
| MAG vs SOY (Network<br>MA)                |                                 | <b>54.90 (-162.51, 272.31)</b>   | Moderate                             | c        |
| MAG vs VIT D (Network<br>MA)              |                                 | <b>-32.75 (-239.85, 174.36)</b>  | Moderate                             | c        |
| MAG vs VIT D – CAL<br>(Network MA)        |                                 | <b>-77.32 (-292.07, 137.43)</b>  | Moderate                             | c        |
| MAG vs ZINC (Network<br>MA)               |                                 | <b>26.50 (-184.97, 237.97)</b>   | Moderate                             | c        |
| MAG vs Ω3 (Network MA)                    |                                 | <b>-24.87 (-220.34, 170.59)</b>  | Moderate                             | c        |
| MAG vs Ω3 – VIT D<br>(Network MA)         |                                 | <b>4.25 (-199.63, 208.13)</b>    | Moderate                             | c        |
| MAG vs Ω3 – VIT E<br>(Network MA)         |                                 | <b>158.10 (-65.49, 381.69)</b>   | Moderate                             | c        |
| PROB vs SEL (Network<br>MA)               |                                 | <b>-50.71 (-185.67, 84.24)</b>   | Moderate                             | c        |
| PROB vs SOY (Network<br>MA)               |                                 | <b>20.56 (-125.34, 166.45)</b>   | Moderate                             | c        |
| PROB vs VIT D (Network<br>MA)             |                                 | <b>-67.09 (-197.14, 62.96)</b>   | Moderate                             | c        |
| PROB vs VIT D - CAL<br>(Network MA)       |                                 | <b>-111.66 (-253.57, 30.24)</b>  | Moderate                             | c        |
| PROB vs ZINC (Network<br>MA)              |                                 | <b>-7.84 (-144.73, 129.04)</b>   | Moderate                             | c        |
| PROB vs Ω3 (Network MA)                   |                                 | <b>-59.22 (-169.79, 51.36)</b>   | Moderate                             | c        |
| PROB vs Ω3 – VIT D<br>(Network MA)        |                                 | <b>-30.09 (-154.94, 94.76)</b>   | Moderate                             | c        |
| PROB vs Ω3 – VIT E<br>(Network MA)        |                                 | <b>123.76 (-31.20, 278.71)</b>   | Moderate                             | c        |
| SEL vs SOY (Network MA)                   |                                 | <b>71.27 (-92.01, 234.55)</b>    | Moderate                             | c        |
| SEL vs VIT D (Network<br>MA)              |                                 | <b>-16.38 (-165.67, 132.92)</b>  | Moderate                             | c        |
| SEL vs VIT D - CAL<br>(Network MA)        |                                 | <b>-60.95 (-220.67, 98.77)</b>   | Moderate                             | c        |
| SEL vs ZINC (Network<br>MA)               |                                 | <b>42.87 (-112.41, 198.15)</b>   | Moderate                             | c        |
| SEL vs Ω3 (Network MA)                    |                                 | <b>-8.50 (-141.17, 124.17)</b>   | Moderate                             | c        |

| Outcomes                                  | Nº of participants<br>(studies) | Mean Difference<br>(95% CI)     | Certainty of the evidence<br>(GRADE) | Comments |
|-------------------------------------------|---------------------------------|---------------------------------|--------------------------------------|----------|
| SEL vs Ω3 – VIT D<br>(Network MA)         |                                 | <b>20.62 (-124.16, 165.41)</b>  | Moderate                             | c        |
| SEL vs Ω3 – VIT E<br>(Network MA)         |                                 | <b>174.47 (3.05,345.89)</b>     | High                                 |          |
| SOY vs VIT D (Network<br>MA)              |                                 | <b>-87.65 (-246.90, 71.61)</b>  | Moderate                             | c        |
| SOY vs VIT D - CAL<br>(Network MA)        |                                 | <b>-132.22 (-301.29, 36.85)</b> | Moderate                             | c        |
| SOY vs ZINC (Network<br>MA)               |                                 | <b>-28.40 (-193.28, 136.48)</b> | Moderate                             | c        |
| SOY vs Ω3 (Network MA)                    |                                 | <b>-79.77 (-223.56, 64.02)</b>  | Moderate                             | c        |
| SOY vs Ω3 – VIT D<br>(Network MA)         |                                 | <b>-50.65 (-205.68, 104.39)</b> | Moderate                             | c        |
| SOY vs Ω3 – VIT E<br>(Network MA)         |                                 | <b>103.20 (-76.97, 283.37)</b>  | Moderate                             | c        |
| VIT D vs VIT D - CAL<br>(Network MA)      |                                 | <b>-44.57 (-200.18, 111.03)</b> | Moderate                             | c        |
| VIT D vs ZINC (Network<br>MA)             |                                 | <b>59.25 (-91.80, 210.29)</b>   | Moderate                             | c        |
| VIT D vs Ω3 – VIT E<br>(Network MA)       |                                 | <b>190.85 (23.25, 358.44)</b>   | High                                 |          |
| VIT D – CAL vs ZINC<br>(Network MA)       |                                 | <b>103.82 (-57.54, 265.18)</b>  | Moderate                             | c        |
| VIT D – CAL vs Ω3<br>(Network MA)         |                                 | <b>52.45 (-87.29, 192.18)</b>   | Moderate                             | c        |
| VIT D – CAL vs Ω3 – VIT<br>D (Network MA) |                                 | <b>81.57 (-69.71, 232.86)</b>   | Moderate                             | c        |
| VIT D – CAL vs Ω3 – VIT<br>E (Network MA) |                                 | <b>235.42 (58.47,412.37)</b>    | High                                 |          |
| ZINC vs Ω3 (Network MA)                   |                                 | <b>-51.37 (-186.01, 83.26)</b>  | Moderate                             | c        |
| ZINC vs Ω3 – VIT D<br>(Network MA)        |                                 | <b>-22.25 (-168.83, 124.34)</b> | Moderate                             | c        |
| ZINC vs Ω3 – VIT E<br>(Network MA)        |                                 | <b>131.60 (-41.35, 304.55)</b>  | Moderate                             | c        |
| Ω3 vs Ω3 – VIT E (Network<br>MA)          |                                 | <b>182.97 (30.00,335.95)</b>    | High                                 |          |
| Ω3 VIT D vs Ω3 – VIT E<br>(Network MA)    |                                 | <b>153.85 (-9.74, 317.43)</b>   | Moderate                             | c        |

- 1 Downgraded one level for study limitations (≥ 1 studies were at high risk of bias or in case of a single study there were some concerns)
- 4 Downgraded one level for imprecision (sparse data)
- a Downgraded one level for study limitations (>50% of studies were at moderate or high risk of bias)
- c Downgraded one level for imprecision (95% CI for MD includes 0)

Table S4. GRADE of the  $\Delta$ MDA (changes in the Malonaldehyde) outcome.

| Outcomes                                         | N <sup>o</sup> of participants (studies) | Mean Difference (95% CI)    | Certainty of the evidence (GRADE) | Comments |
|--------------------------------------------------|------------------------------------------|-----------------------------|-----------------------------------|----------|
| MAG-ZIN-CALvs Placebo (direct evidence)          | 60 (1 study)                             | <b>-0.60 (1.01, -0.19)</b>  | High                              |          |
| MAG-ZIN-CALvs Placebo (Network MA)               |                                          | <b>-0.60 (-1.01,-0.19)</b>  | Moderate                          | c        |
| MAG vs Placebo (direct evidence)                 | 70 (1 study)                             | <b>-0.80 (-1.46, -0.14)</b> | Low                               | 1,4      |
| MAG vs Placebo (Network MA)                      |                                          | <b>-0.80 (-1.46,-0.14)</b>  | Low                               | a, c     |
| PROB vs Placebo (direct evidence)                | 120 (2 studies)                          | <b>-0.45 (-0.74, -0.16)</b> | High                              |          |
| PROB vs Placebo (Network MA)                     |                                          | <b>-0.59 (-1.17 ,0.00)</b>  | High                              |          |
| SOY vs Placebo (direct evidence)                 | 68 (1 study)                             | <b>-0.50 (-1.04, 0.04)</b>  | High                              |          |
| SOY vs Placebo (Network MA)                      |                                          | <b>-0.50 (-1.04,0.04)</b>   | Moderate                          | c        |
| VIT D vs Placebo (direct evidence)               | 60 (1 study)                             | <b>-0.70 (-1.23, -0.17)</b> | Moderate                          | 4        |
| VIT D vs Placebo (Network MA)                    |                                          | <b>-0.74 (-1.22,-0.25)</b>  | Moderate                          | c        |
| VIT D-CAL vs Placebo (direct evidence)           | 56 (1 study)                             | <b>-0.87 (-1.65, -0.09)</b> | Moderate                          | 4        |
| VIT D-CAL vs Placebo (Network MA)                |                                          | <b>0.87 (-1.65,-0.09)</b>   | Moderate                          | c        |
| ZINC vs Placebo (direct evidence)                | 50 (1 study)                             | <b>-0.90 (-1.83, 0.03)</b>  | High                              |          |
| ZINC vs Placebo (Network MA)                     |                                          | <b>-0.90 (-1.83,0.03)</b>   | Very low                          | c        |
| $\Omega$ 3 vs Placebo (direct evidence)          | 114 (2 studies)                          | <b>-0.85 (-1.36, -0.34)</b> | Moderate                          | 4        |
| $\Omega$ 3 vs Placebo (Network MA)               |                                          | <b>-0.85 (-1.36,-0.34)</b>  | High                              |          |
| $\Omega$ 3-VIT D vs Placebo (direct evidence)    | 60 (1 study)                             | <b>-1.00 [-1.53, -0.47]</b> | High                              |          |
| $\Omega$ 3-VIT D vs Placebo (Network MA)         |                                          | <b>-1.04 (-2.88,0.81)</b>   | Moderate                          | c        |
| $\Omega$ 3-VIT E vs Placebo (direct evidence)    | 60 (1 study)                             | <b>-0.70 [-1.30, -0.10]</b> | High                              |          |
| $\Omega$ 3-VIT E vs Placebo (Network MA)         |                                          | <b>-0.70 (-1.30,-0.10)</b>  | High                              |          |
| $\Omega$ 3 vs VIT D (direct evidence)            | 60 (1 study)                             | <b>33.30 (-22.57,89.12)</b> | Moderate                          | 4        |
| $\Omega$ 3 vs VIT D (Network MA)                 |                                          | <b>-0.12 (-0.47,0.24)</b>   | Moderate                          | c        |
| $\Omega$ 3-VIT D vs VIT D (direct evidence)      | 60 (1 study)                             | <b>37.0 (-13.84,87.84)</b>  | Moderate                          | 4        |
| $\Omega$ 3-VIT D vs VIT D (Network MA)           |                                          | <b>-0.30 (-2.10,1.50)</b>   | Moderate                          | c        |
| $\Omega$ 3-VIT D vs $\Omega$ 3 (direct evidence) | 60 (1 study)                             | <b>3.70 (-38.60,46.0)</b>   | Moderate                          | 4        |
| $\Omega$ 3-VIT D vs $\Omega$ 3 (Network MA)      |                                          | <b>-0.18 (-2.00,1.63)</b>   | Moderate                          | c        |
| MAG-ZIN-CALvs MAG (Network MA)                   |                                          | <b>-0.20 (-0.98,0.58)</b>   | Moderate                          | c        |
| MAG-ZIN-CALvs PROB (Network MA)                  |                                          | <b>0.01 (-0.70,0.73)</b>    | Moderate                          | c        |
| MAG-ZIN-CALvs SOY (Network MA)                   |                                          | <b>0.10 (-0.58,0.78)</b>    | Moderate                          | c        |

| Outcomes                                  | Nº of participants<br>(studies) | Mean Difference<br>(95% CI) | Certainty of the evidence<br>(GRADE) | Comments |
|-------------------------------------------|---------------------------------|-----------------------------|--------------------------------------|----------|
| MAG-ZIN-CALvs VIT D<br>(Network MA)       |                                 | <b>-0.14 (-0.77,0.50)</b>   | Moderate                             | c        |
| MAG-ZIN-CALvs VIT D -<br>CAL (Network MA) |                                 | <b>-0.27 (-1.15,0.61)</b>   | Moderate                             | c        |
| MAG-ZIN-CALvs ZINC<br>(Network MA)        |                                 | <b>-0.30 (-1.31,0.71)</b>   | Moderate                             | c        |
| MAG-ZIN-CALvs Ω3<br>(Network MA)          |                                 | <b>-0.30 (-1.31,0.71)</b>   | Moderate                             | c        |
| MAG-ZIN-CALvs Ω3 –<br>VIT D (Network MA)  |                                 | <b>-0.44 (-2.33,1.45)</b>   | Moderate                             | c        |
| MAG-ZIN-CALvs Ω3 –<br>VIT E (Network MA)  |                                 | <b>-0.10 (-0.82,0.62)</b>   | Moderate                             | c        |
| MAG vs PROB (Network<br>MA)               |                                 | <b>0.21 (-0.67,1.10)</b>    | Moderate                             | c        |
| MAG vs SOY (Network<br>MA)                |                                 | <b>0.30 (-0.56,1.16)</b>    | Moderate                             | c        |
| MAG vs VIT D (Network<br>MA)              |                                 | <b>0.06 (-0.76,0.88)</b>    | Moderate                             | c        |
| MAG vs VIT D – CAL<br>(Network MA)        |                                 | <b>--0.07 (-1.09,0.95)</b>  | Moderate                             | c        |
| MAG vs ZINC (Network<br>MA)               |                                 | <b>-0.10 (-1.24,1.04)</b>   | Moderate                             | c        |
| MAG vs Ω3 (Network MA)                    |                                 | <b>-0.05 (-0.89,0.78)</b>   | Moderate                             | c        |
| MAG vs Ω3 – VIT D<br>(Network MA)         |                                 | <b>-0.24 (-2.20,1.72)</b>   | Moderate                             | c        |
| MAG vs Ω3 – VIT E<br>(Network MA)         |                                 | <b>0.10 (-0.79,0.99)</b>    | Moderate                             | c        |
| PROB vs SOY (Network<br>MA)               |                                 | <b>0.09 (-0.71,0.88)</b>    | Moderate                             | c        |
| PROB vs VIT D (Network<br>MA)             |                                 | <b>-0.15 (-0.91,0.61)</b>   | Moderate                             | c        |
| PROB vs VIT D - CAL<br>(Network MA)       |                                 | <b>-0.28 (-1.26,0.69)</b>   | Moderate                             | c        |
| PROB vs ZINC (Network<br>MA)              |                                 | <b>-0.31 (-1.41,0.78)</b>   | Moderate                             | c        |
| PROB vs Ω3 (Network MA)                   |                                 | <b>-0.27 (-1.04,0.51)</b>   | Moderate                             | c        |
| PROB vs Ω3 – VIT D<br>(Network MA)        |                                 | <b>-0.45 (-2.39,1.48)</b>   | Moderate                             | c        |
| PROB vs Ω3 – VIT E<br>(Network MA)        |                                 | <b>-0.11 (-0.95,0.72)</b>   | Moderate                             | c        |
| SOY vs VIT D (Network<br>MA)              |                                 | <b>-0.24 (-0.97,0.49)</b>   | Moderate                             | c        |
| SOY vs VIT D - CAL<br>(Network MA)        |                                 | <b>-0.37 (-1.32,0.58)</b>   | Moderate                             | c        |
| SOY vs ZINC (Network<br>MA)               |                                 | <b>-0.40 (-1.47,0.67)</b>   | Moderate                             | c        |
| SOY vs Ω3 (Network MA)                    |                                 | <b>-0.35 (-1.10,0.39)</b>   | Moderate                             | c        |
| SOY vs Ω3 – VIT D<br>(Network MA)         |                                 | <b>-0.54 (-2.46,1.39)</b>   | Moderate                             | c        |
| SOY vs Ω3 – VIT E<br>(Network MA)         |                                 | <b>-0.20 (-1.01,0.61)</b>   | Moderate                             | c        |
| VIT D vs VIT D - CAL<br>(Network MA)      |                                 | <b>-0.13 (-1.05,0.79)</b>   | Moderate                             | c        |
| VIT D vs ZINC (Network<br>MA)             |                                 | <b>-0.16 (-1.21,0.88)</b>   | Moderate                             | c        |
| VIT D vs Ω3 (Network MA)                  |                                 | <b>-0.12 (-0.47,0.24)</b>   |                                      |          |
| VIT D vs Ω3– VIT D<br>(Network MA)        |                                 | <b>-0.30 (-2.10,1.50)</b>   |                                      |          |

| Outcomes                                  | Nº of participants<br>(studies) | Mean Difference<br>(95% CI) | Certainty of the evidence<br>(GRADE) | Comments |
|-------------------------------------------|---------------------------------|-----------------------------|--------------------------------------|----------|
| VIT D vs Ω3 – VIT E<br>(Network MA)       |                                 | <b>0.04 (-0.73,0.81)</b>    | High                                 |          |
| VIT D – CAL vs ZINC<br>(Network MA)       |                                 | <b>-0.03 (-1.24,1.18)</b>   | Moderate                             | c        |
| VIT D – CAL vs Ω3<br>(Network MA)         |                                 | <b>0.02 (-0.92,0.95)</b>    | Moderate                             | c        |
| VIT D – CAL vs Ω3 – VIT<br>D (Network MA) |                                 | <b>-0.17 (-2.17,1.84)</b>   | Moderate                             | c        |
| VIT D – CAL vs Ω3 – VIT<br>E (Network MA) |                                 | <b>0.17 (-0.81,1.15)</b>    | High                                 |          |
| ZINC vs Ω3 (Network MA)                   |                                 | <b>0.05 (-1.01,1.10)</b>    | Moderate                             | c        |
| ZINC vs Ω3 – VIT D<br>(Network MA)        |                                 | <b>-0.14 (-2.20,1.93)</b>   | Moderate                             | c        |
| ZINC vs Ω3 – VIT E<br>(Network MA)        |                                 | <b>0.20 (-0.90,1.30)</b>    | Moderate                             | c        |
| Ω3 vs Ω3 – VIT D (Network<br>MA)          |                                 | <b>-0.18 (-2.00,1.63)</b>   |                                      |          |
| Ω3 vs Ω3 – VIT E (Network<br>MA)          |                                 | <b>0.15 (-0.63,0.94)</b>    | High                                 |          |
| Ω3 VIT D vs Ω3 – VIT E<br>(Network MA)    |                                 | <b>0.34 (-1.60,2.28)</b>    | Moderate                             | c        |

- 1 Downgraded one level for study limitations ( $\geq 1$  studies were at high risk of bias or in case of a single study there were some concerns)
- 4 Downgraded one level for imprecision (sparse data)
- a Downgraded one level for study limitations ( $>50\%$  of studies were at moderate or high risk of bias)
- c Downgraded one level for imprecision (95% CI for MD includes 0)

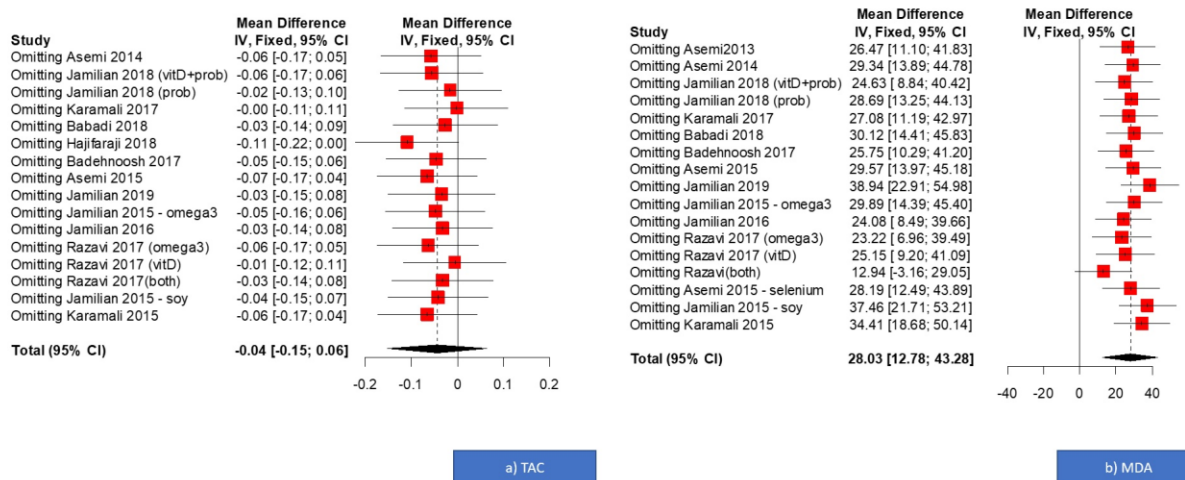

Figure S1: Leave one out analysis for the baseline values of A) TAC and B) MDA, investigating the influence of each individual study on the overall meta-analysis summary estimate.

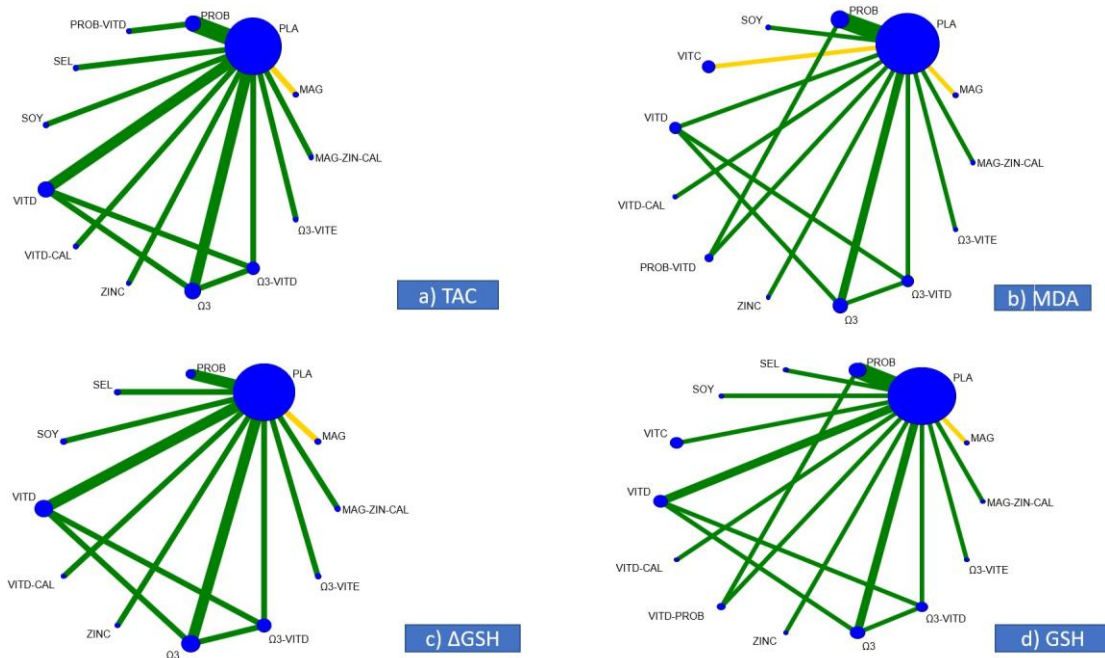

Figure S2: Network plots for the secondary outcomes of A) TAC B) MDA, C)  $\Delta$ GSH, D) GSH. Treatments are represented by nodes and head-to-head comparisons with edges. The size of the nodes is proportional to the number of the patients, while the thickness of the edges is proportional to the number of studies. The color of the edges represents the average risk of bias for each head-to-head comparison, green for low risk of bias, yellow for uncertain risk of bias, and red for high risk of bias.



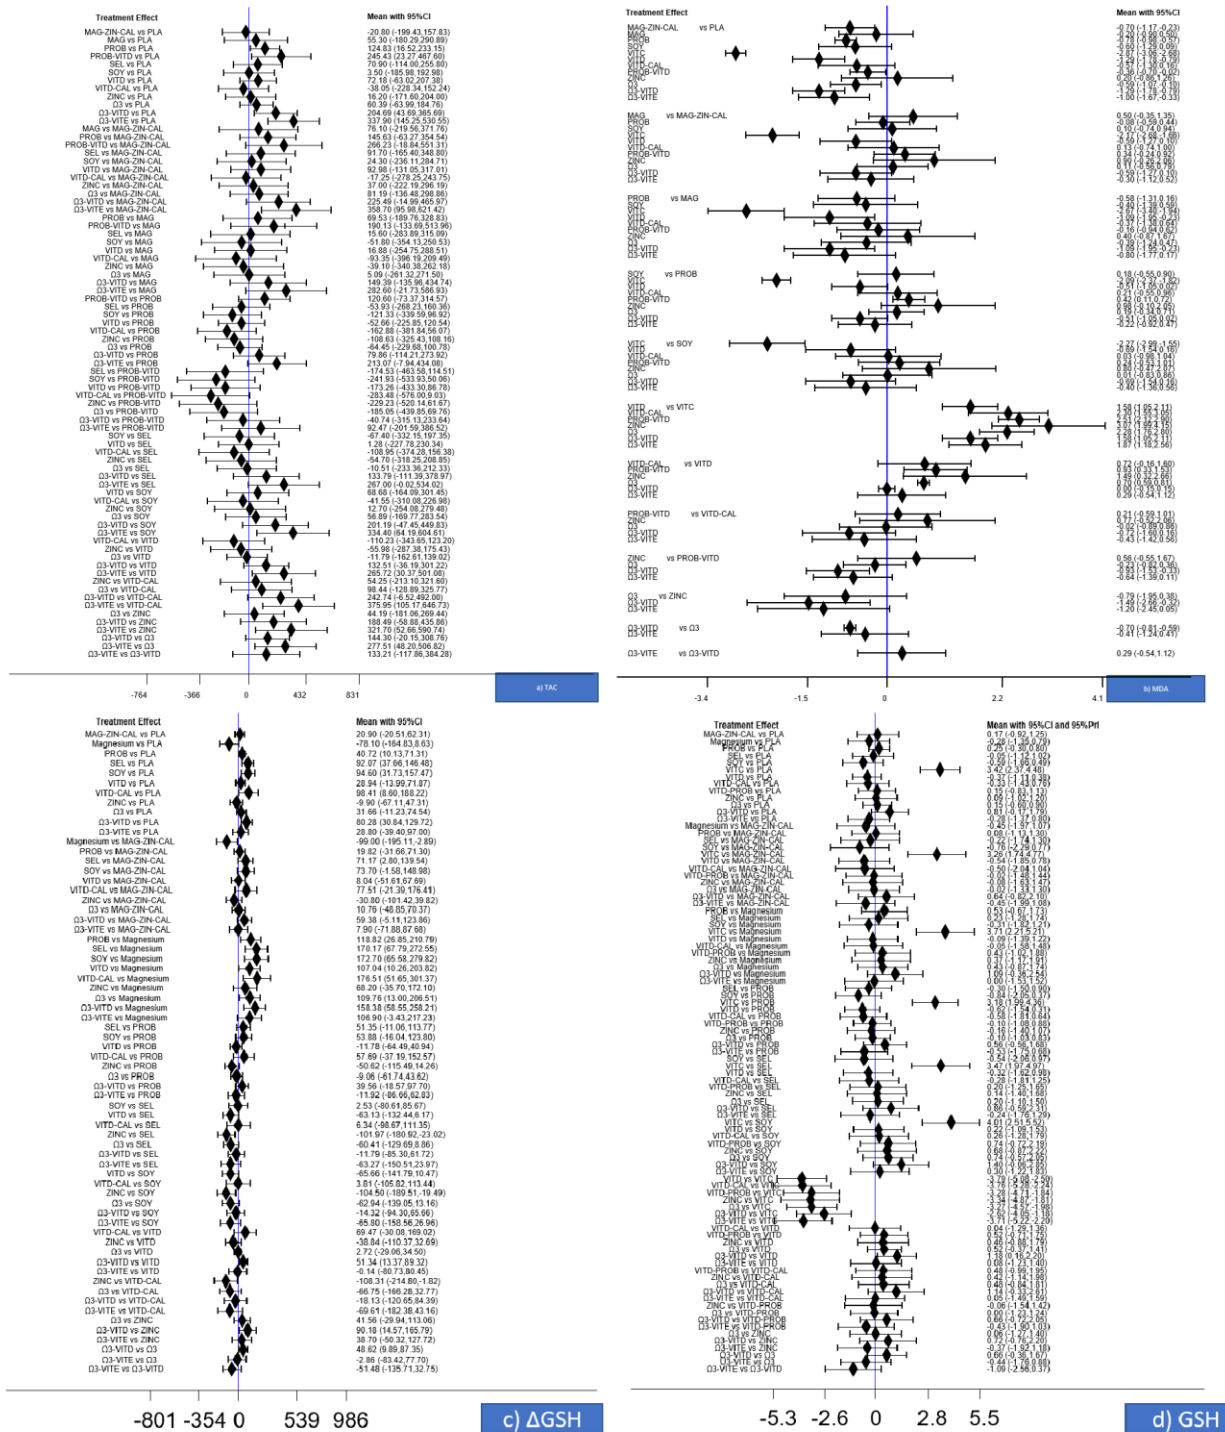

Figure S3: Mean difference (MD) for A) TAC, B) MDA, C) ΔGSH and D) GSH as estimated from the network meta-analysis for every possible pair of interventions. Solid lines represent 95% Confidence Intervals (Cis)

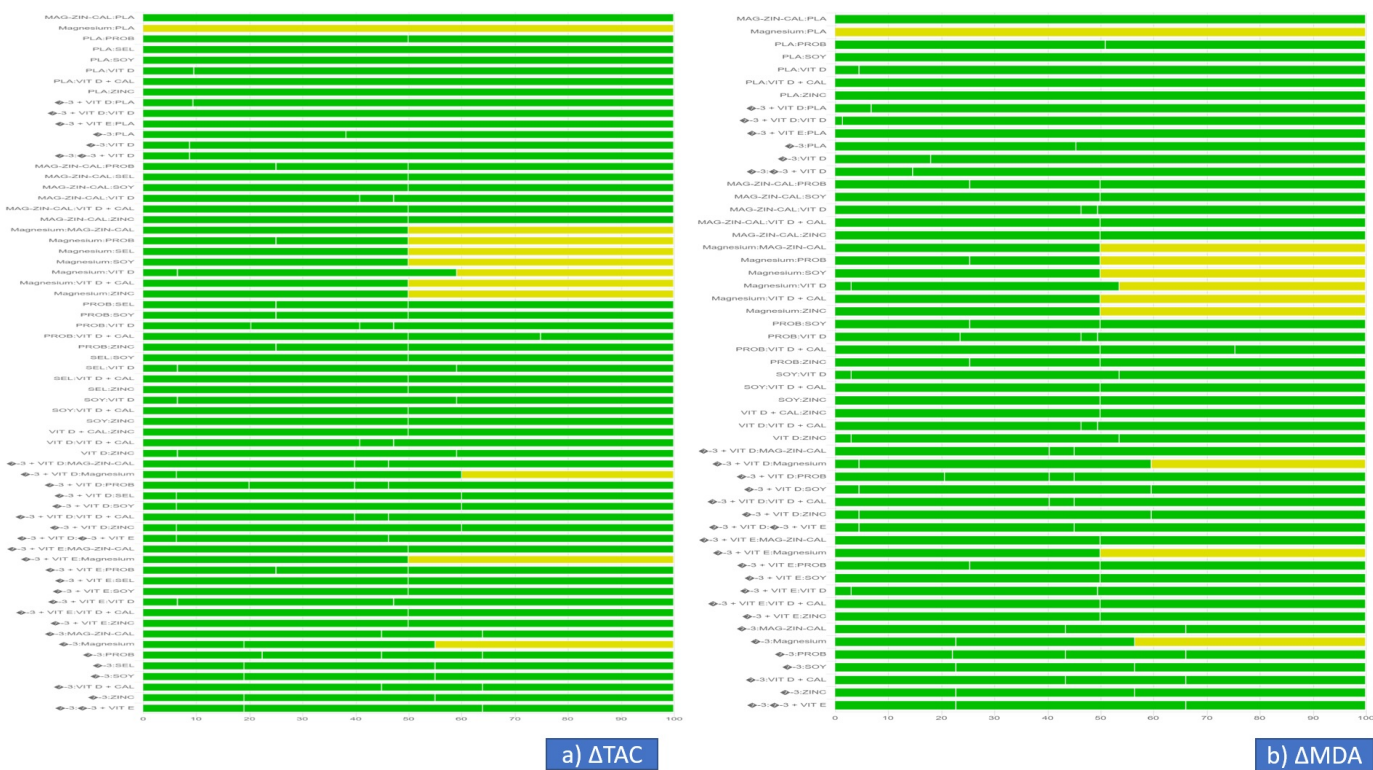

Figure S4: The contributions of direct and indirect data to the network estimate.

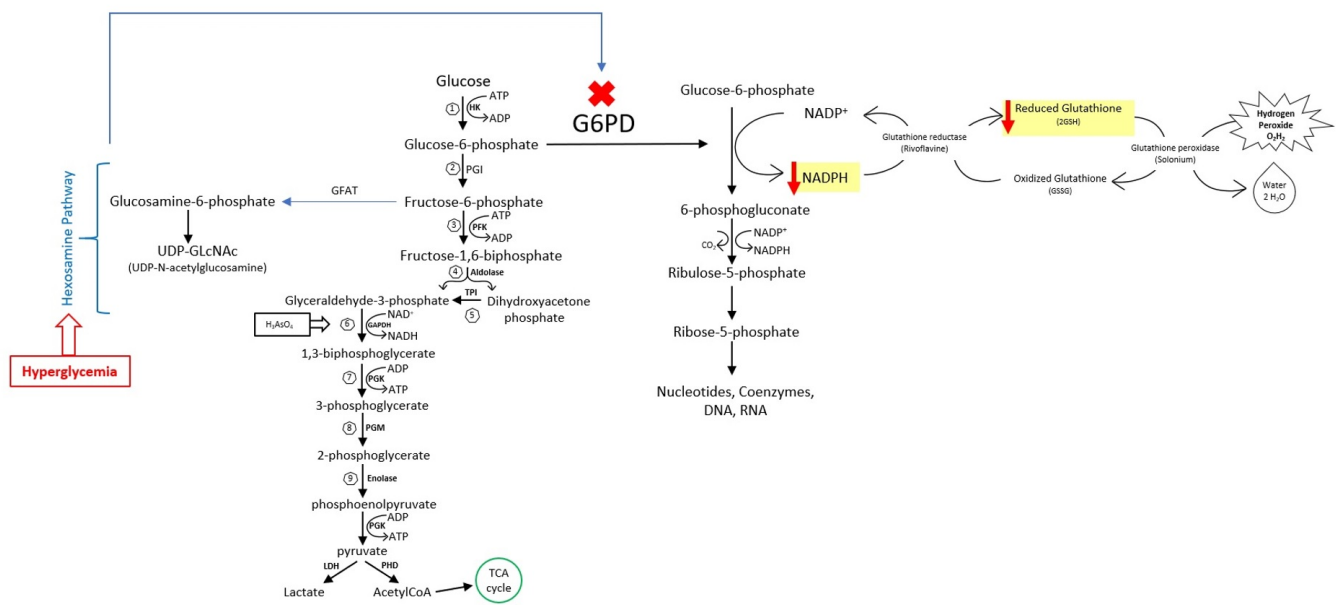

Figure S5: Pathophysiology between hyperglycemia and impairment of antioxidant mechanisms
